# Supplementary material
Source: publisher figshare collection journal article supplement (https://acs.figshare.com/ndownloader/files/11501105)
Supplement: Supplementary file 1 [file 11501105]

# Supporting Information

## Electronic Devices Based on Oxide Thin Films Fabricated by Fibers-to-film Process

*You Meng,<sup>a,b</sup> Ao Liu,<sup>a,b</sup> Zidong Guo,<sup>a,b</sup> Guoxia Liu,<sup>a,b\*</sup> Byoungchul Shin,<sup>c</sup> Yong-Young Noh,<sup>d</sup> Elvira Fortunato,<sup>e</sup> Rodrigo Martins<sup>e</sup> and Fukai Shan<sup>a,b\*</sup>*

<sup>a</sup>College of Physics, Qingdao University, Qingdao 266071, China

<sup>b</sup>College of Electronic & Information Engineering, Qingdao University, Qingdao 266071, China

<sup>c</sup>Electronic Ceramics Center, Dong-Eui University, Busan 614-714, Korea

<sup>d</sup>Department of Energy and Materials Engineering, Dongguk University, Seoul 100-715, Korea

<sup>e</sup>Department of Materials Science/CENIMAT-I3N, Faculty of Sciences and Technology, New University of Lisbon and CEMOP-UNINOVA, Campus de Caparica, 2829-516 Caparica, Portugal

### Corresponding author

\* To whom correspondence should be addressed.

\*E-mail: [gxliu@qdu.edu.cn](mailto:gxliu@qdu.edu.cn); [fukaishan@yahoo.com](mailto:fukaishan@yahoo.com)

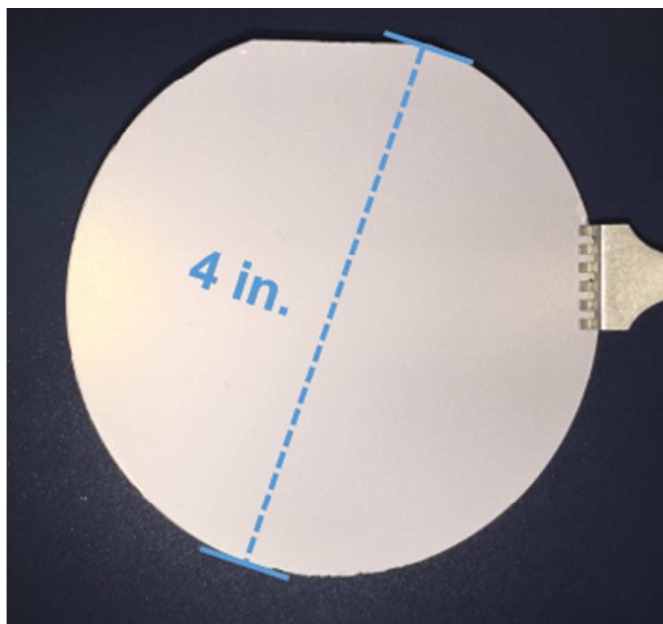

**Figure S1.** Photograph of as-spun  $\text{In}^{3+}$ /PLA nanofibers based on a 4 in.  $\text{SiO}_2/\text{Si}$  wafer.

---

\* Corresponding author: [gxliu@qdu.edu.cn](mailto:gxliu@qdu.edu.cn); [fukaishan@yahoo.com](mailto:fukaishan@yahoo.com)

### a. Electrospinning

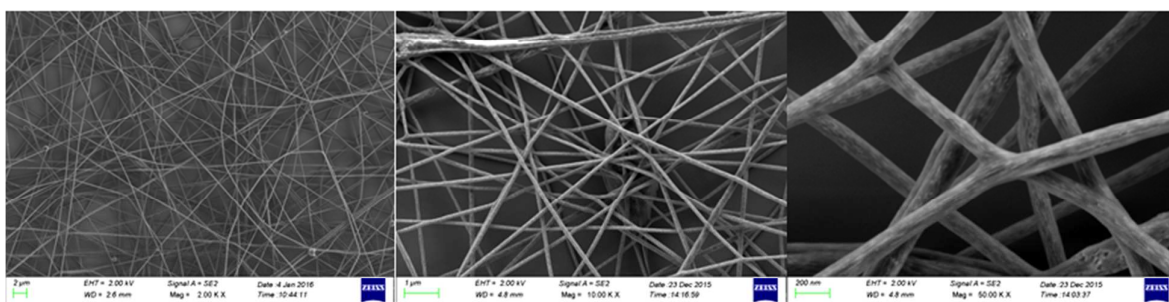

### b. Melting

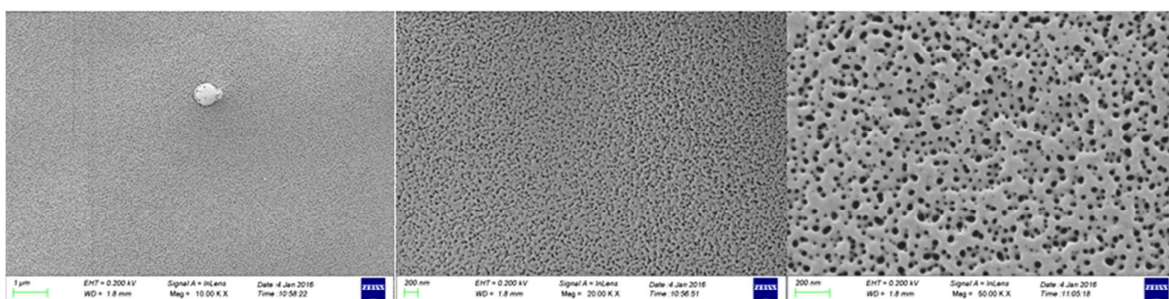

### c. UV treatment & annealing

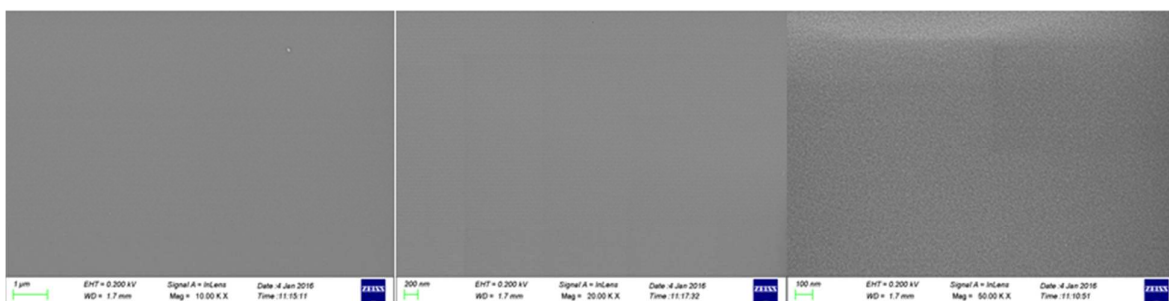

**Figure S2.** The morphological characteristics of **(a)** as-spun  $\text{In}^{3+}/\text{PLA}$  nanofibers, **(b)** melted  $\text{In}_2\text{O}_3$  thin films, and **(c)** melted  $\text{In}_2\text{O}_3$  thin films after UV treatment and thermally annealing at 350  $^{\circ}\text{C}$ .

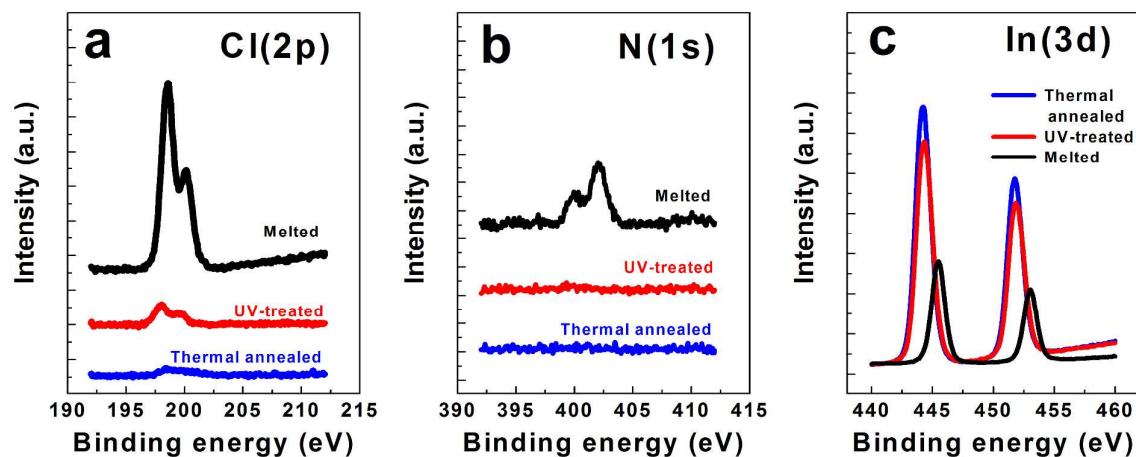

**Figure S3.** XPS (a) Cl(2p), (b) N(1s), and (c) In(3d) peak analysis of In<sub>2</sub>O<sub>3</sub> thin films after being melted, after UV treatment, and after UV treatment followed by thermally annealing at 350 °C.

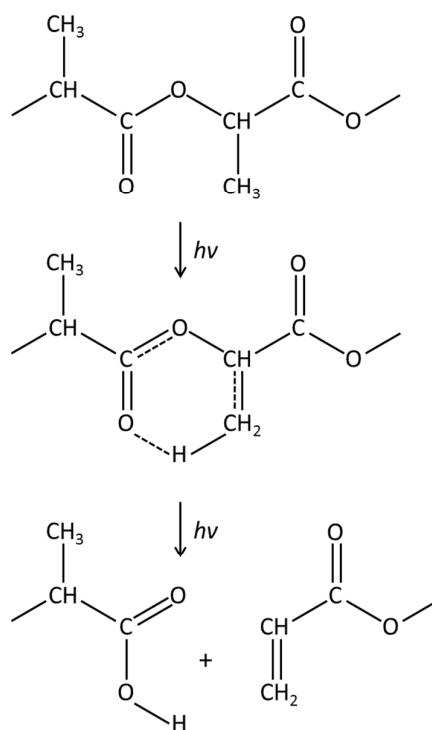

**Figure S4.** Norrish II type photochemical reaction in PLA. As a result of the photon-induced molecule excitation, the hydrogen atom of methyl group interacts with the oxygen atom of carbonyl, and the cyclic six-member intermediate is formed. The secondary bonds of cyclic six-member intermediate possess a dissociation energy of 0.5~10 kcal/mol, which is much lower than 200 kcal/mol of covalent intermolecular bonds. Therefore, these weak secondary bonds can be easily split by UV irradiation.

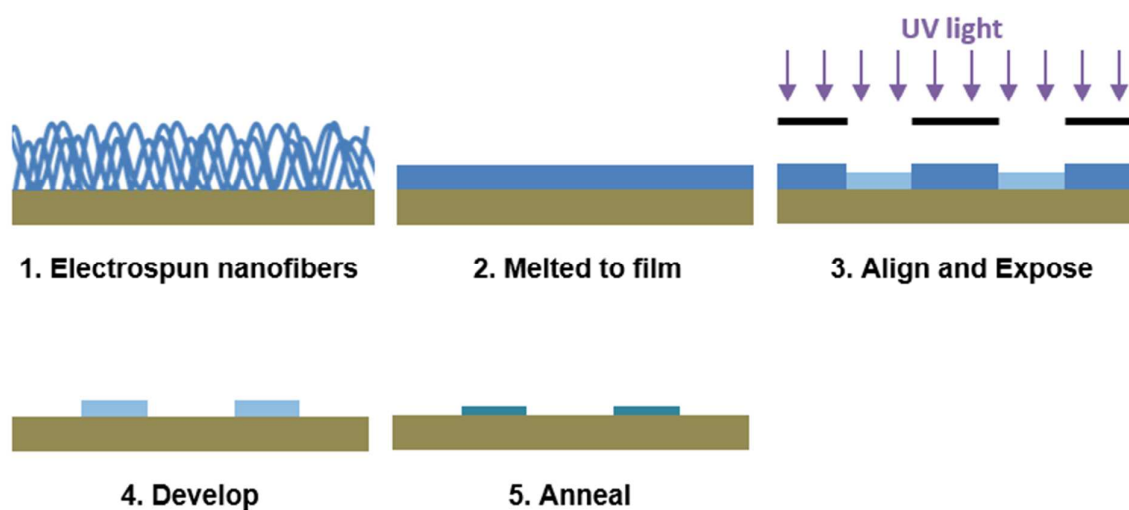

**Figure S5.** Flow diagram of the photoresist-free photolithography process.

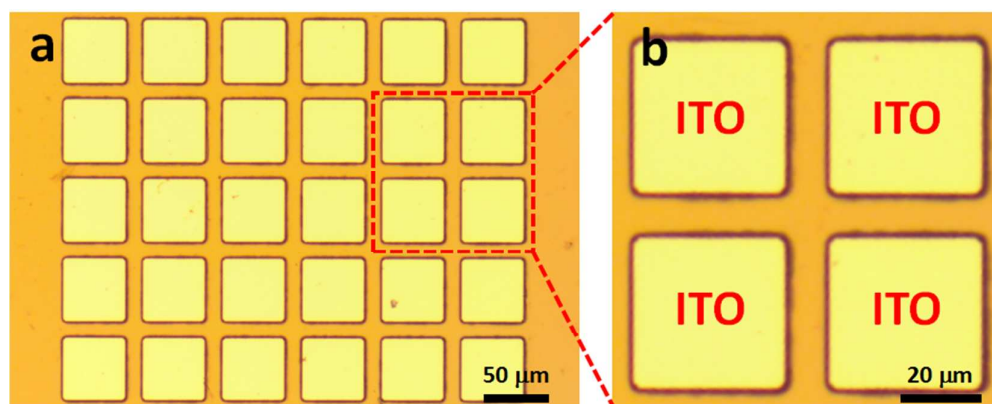

**Figure S6.** (a) Optical image and (b) the corresponding enlarged image of InSnO (ITO) thin films patterned by photoresist-free lithography.

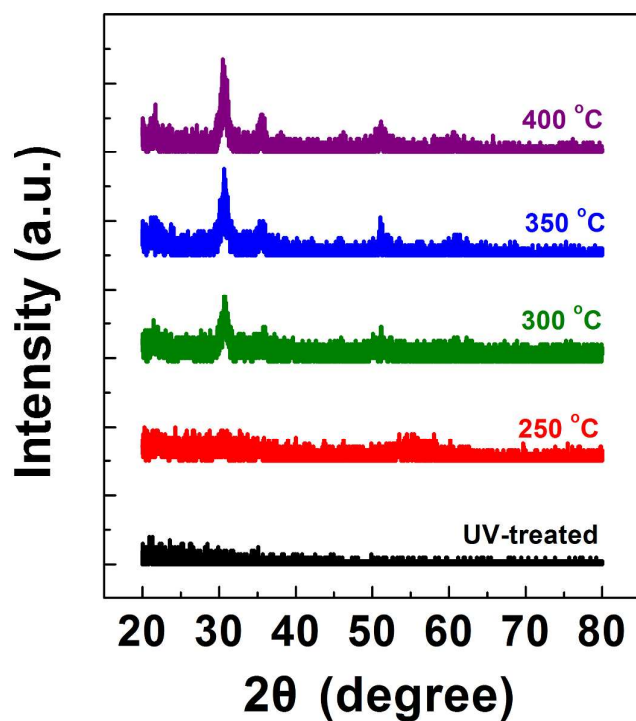

**Figure S7.** XRD patterns of FTF-processed In<sub>2</sub>O<sub>3</sub> thin films (thickness: 100 nm) annealed at various temperatures ( $T_a$ ).

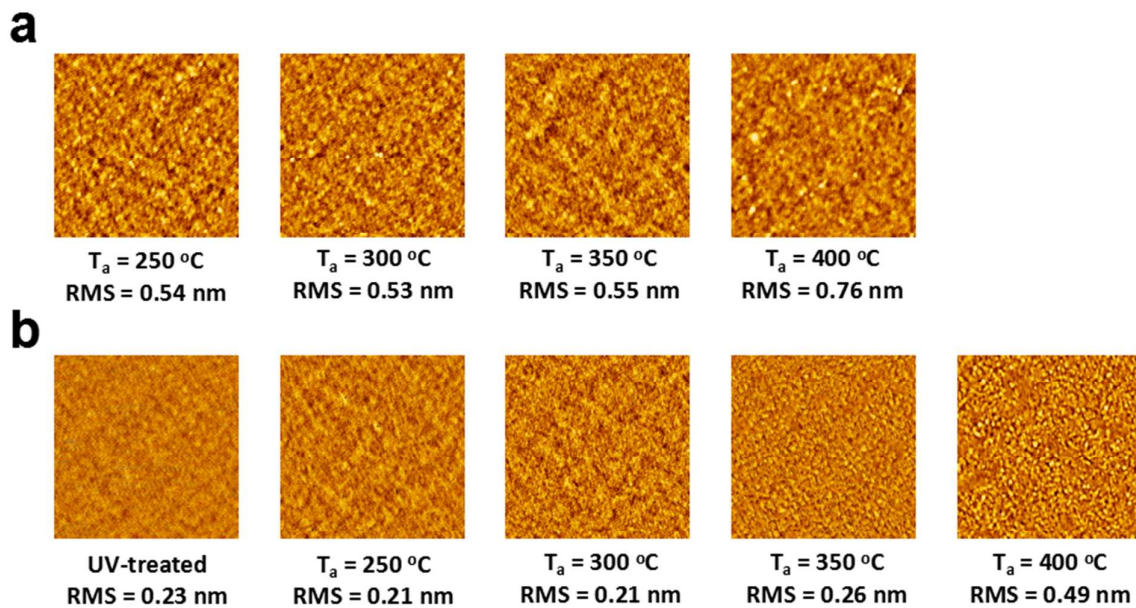

**Figure S8.** AFM images (1×1 μm) of In<sub>2</sub>O<sub>3</sub> thin films (thickness: 20 nm) annealed at various  $T_a$  (a) without and (b) with UV treatment.



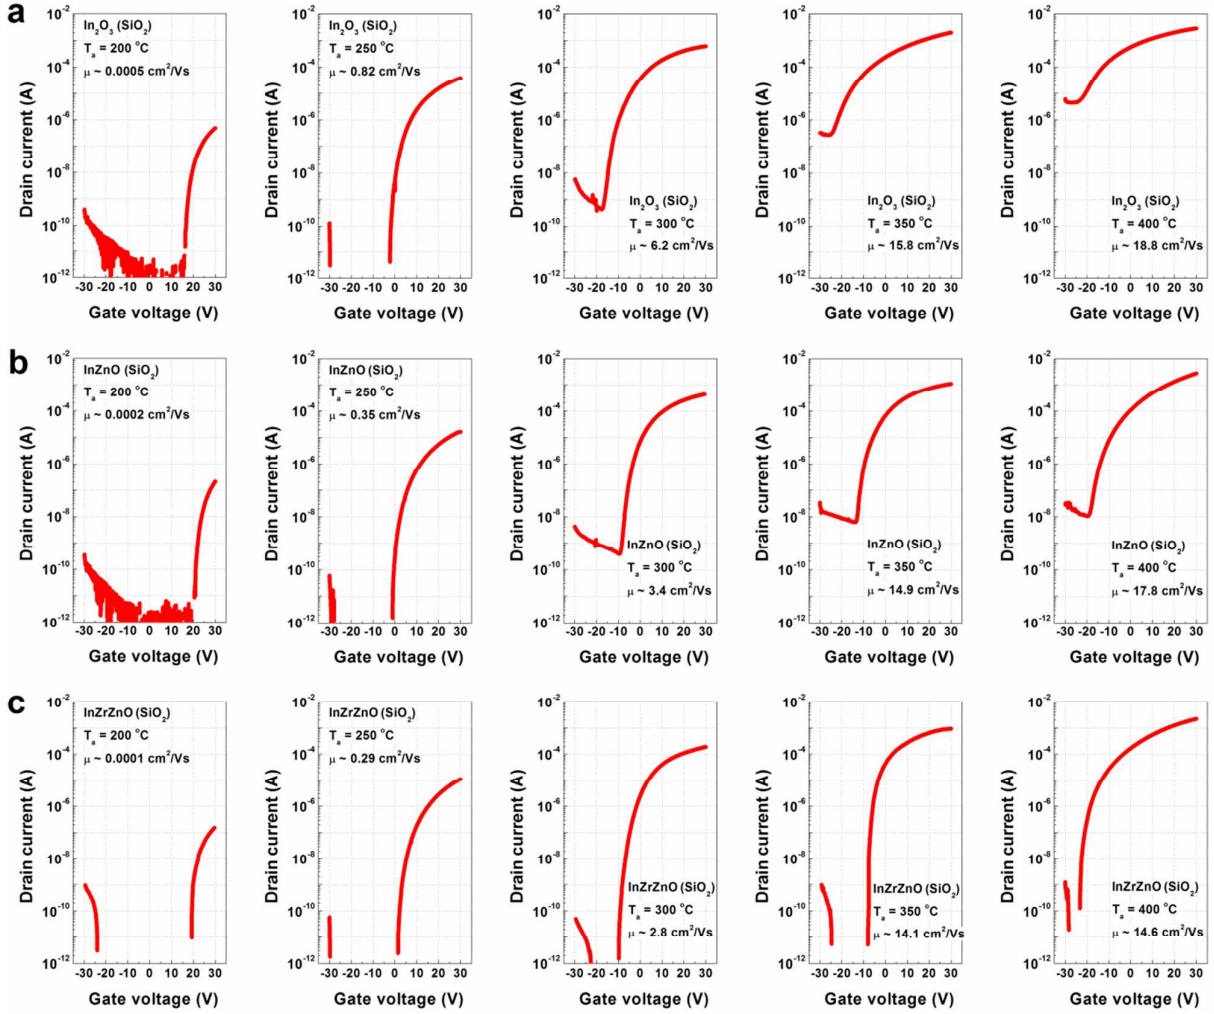

**Figure S9.** Transfer characteristics and corresponding mobilities of FTF-processed (a)  $\text{In}_2\text{O}_3$ , (b)  $\text{InZnO}$  and (c)  $\text{InZrZnO}$  TFTs based on  $\text{SiO}_2$  dielectric layers annealed at various  $T_a$ . The thicknesses of the channel layers are 20 nm; source-drain voltage ( $V_D$ ) is 30 V. The channel length and width for all the devices are 100  $\mu\text{m}$  and 1000  $\mu\text{m}$ , respectively.

**Table S1** Electrical parameters of FTF-processed  $\text{In}_2\text{O}_3$ ,  $\text{InZnO}$  and  $\text{InZrZnO}$  TFTs based on  $\text{SiO}_2$  dielectric layers annealed at various  $T_a$ .

| <i>Metal oxide</i>                        | $T_a$ ( $^{\circ}\text{C}$ ) | <i>Mobility</i> ( $\text{cm}^2\text{V}^{-1}\text{s}^{-1}$ ) | $I_{on}/I_{off}$ | $V_{TH}$ (V) |
|-------------------------------------------|------------------------------|-------------------------------------------------------------|------------------|--------------|
| <i><math>\text{In}_2\text{O}_3</math></i> | <b>200</b>                   | Inactive ( $\mu \sim 0.0005$ )*                             |                  |              |
|                                           | <b>250</b>                   | 0.82                                                        | $\sim 10^7$      | $\sim 13$    |
|                                           | <b>300</b>                   | 6.2                                                         | $\sim 10^6$      | $\sim 0$     |
|                                           | <b>350</b>                   | 15.8                                                        | $\sim 10^4$      | $\sim -1$    |
|                                           | <b>400</b>                   | 18.8                                                        | $\sim 10^3$      | $\sim -8$    |
| <i><math>\text{InZnO}</math></i>          | <b>200</b>                   | Inactive ( $\mu \sim 0.0002$ )*                             |                  |              |
|                                           | <b>250</b>                   | 0.35                                                        | $\sim 10^7$      | $\sim 15$    |
|                                           | <b>300</b>                   | 3.4                                                         | $\sim 10^7$      | $\sim 3$     |
|                                           | <b>350</b>                   | 14.9                                                        | $\sim 10^6$      | $\sim -2$    |
|                                           | <b>400</b>                   | 17.8                                                        | $\sim 10^5$      | $\sim -5$    |
| <i><math>\text{InZrZnO}</math></i>        | <b>200</b>                   | Inactive ( $\mu \sim 0.0002$ )*                             |                  |              |
|                                           | <b>250</b>                   | 0.29                                                        | $\sim 10^7$      | $\sim 17$    |
|                                           | <b>300</b>                   | 2.8                                                         | $\sim 10^8$      | $\sim 3$     |
|                                           | <b>350</b>                   | 14.1                                                        | $\sim 10^9$      | $\sim 0$     |
|                                           | <b>400</b>                   | 14.6                                                        | $\sim 10^8$      | $\sim -5$    |

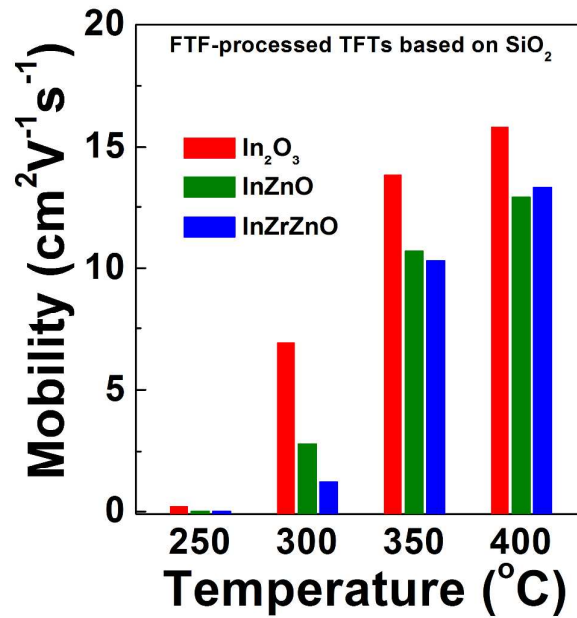

**Figure S10.** Mobility distribution of FTF-processed TFTs based on  $\text{SiO}_2$  dielectric layers annealed at various  $T_a$ .

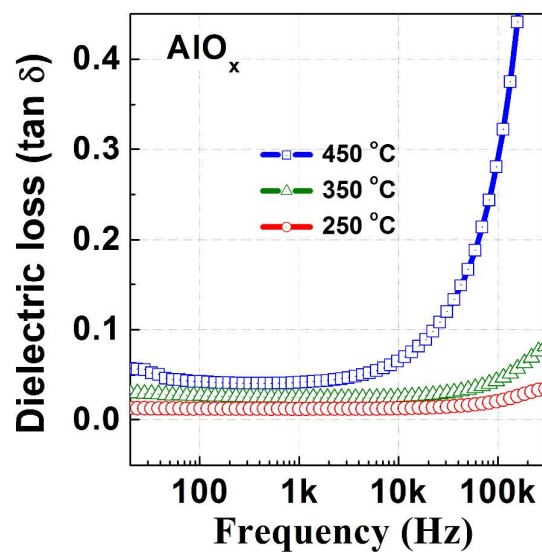

**Figure S11.** Dielectric losses ( $\tan \delta$ ) of the FTF-processed  $\text{AlO}_x$  dielectric layers as functions of frequency measured at room temperature.

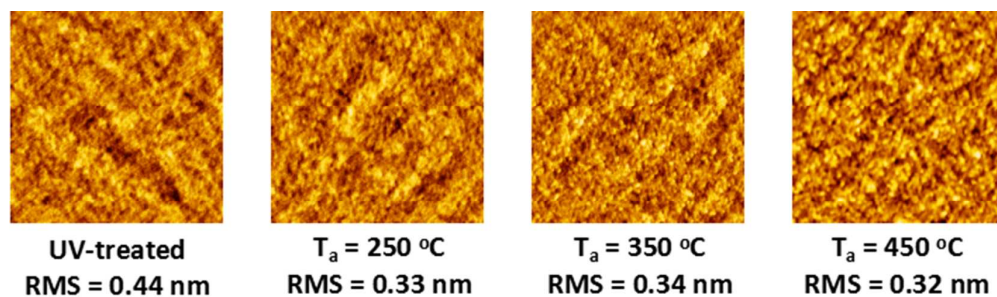

**Figure S12.** AFM images ( $1 \times 1 \mu\text{m}$ ) of FTF-processed  $\text{AlO}_x$  thin films annealed at various  $T_a$ .

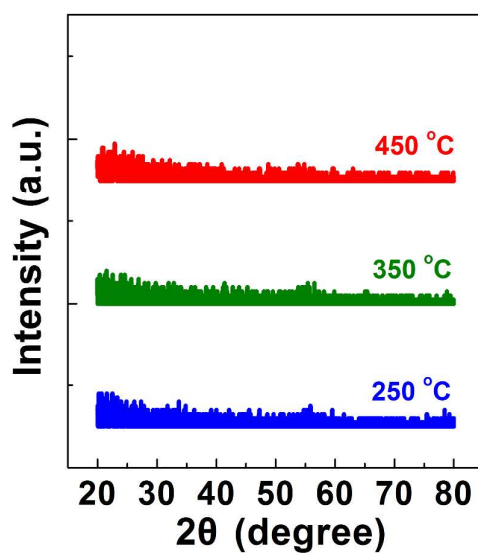

**Figure S13.** XRD patterns of FTF-processed  $\text{AlO}_x$  dielectric layers annealed at various  $T_a$ .



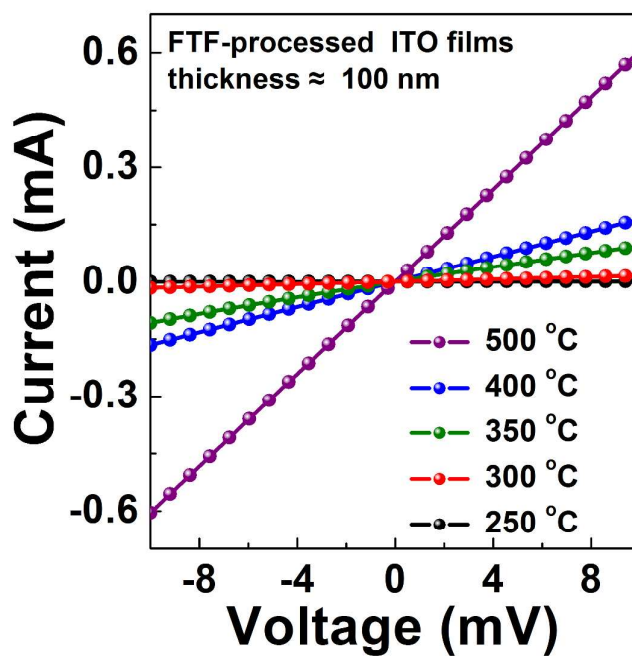

**Figure S14.** I-V characteristics of FTF-processed ITO films (In:Sn = 90:10, thickness: 100 nm) annealed at various  $T_a$ .

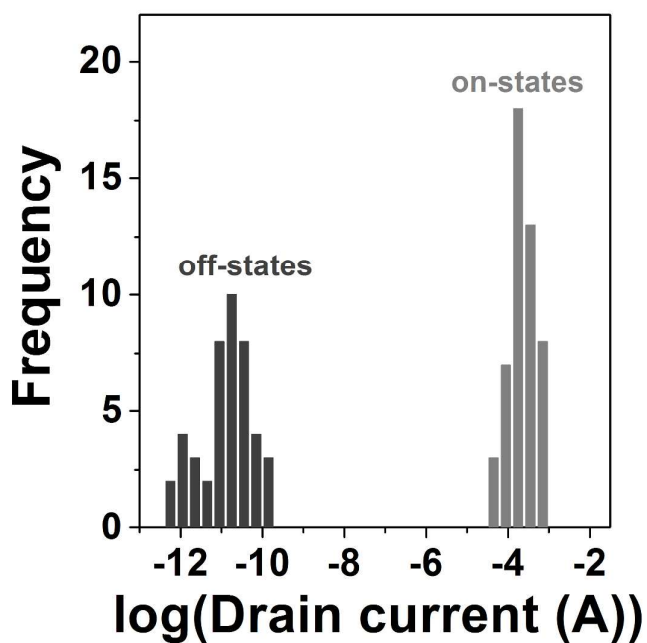

**Figure S15.** Histogram of on-state current and off-state current of 49 fully-FTF-processed  $\text{In}_2\text{O}_3/\text{AlO}_x$  TFTs.

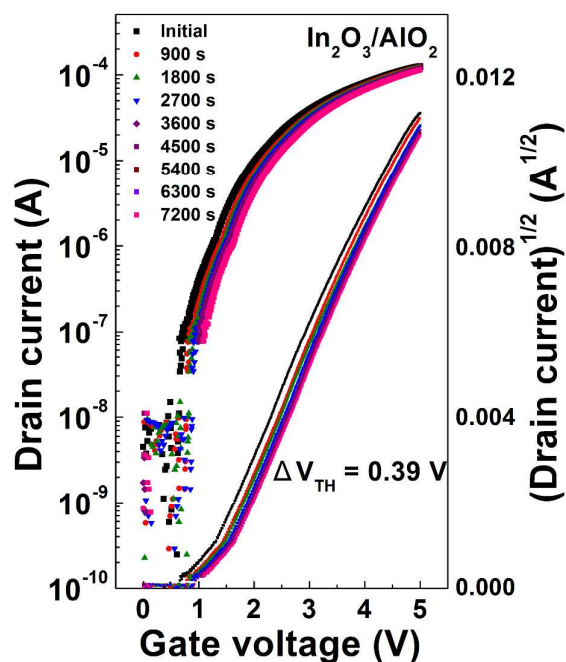

**Figure S16.** Transfer characteristics of fully-FTF-processed  $\text{In}_2\text{O}_3/\text{AlO}_x$  TFTs under PBS test for 7200 s.

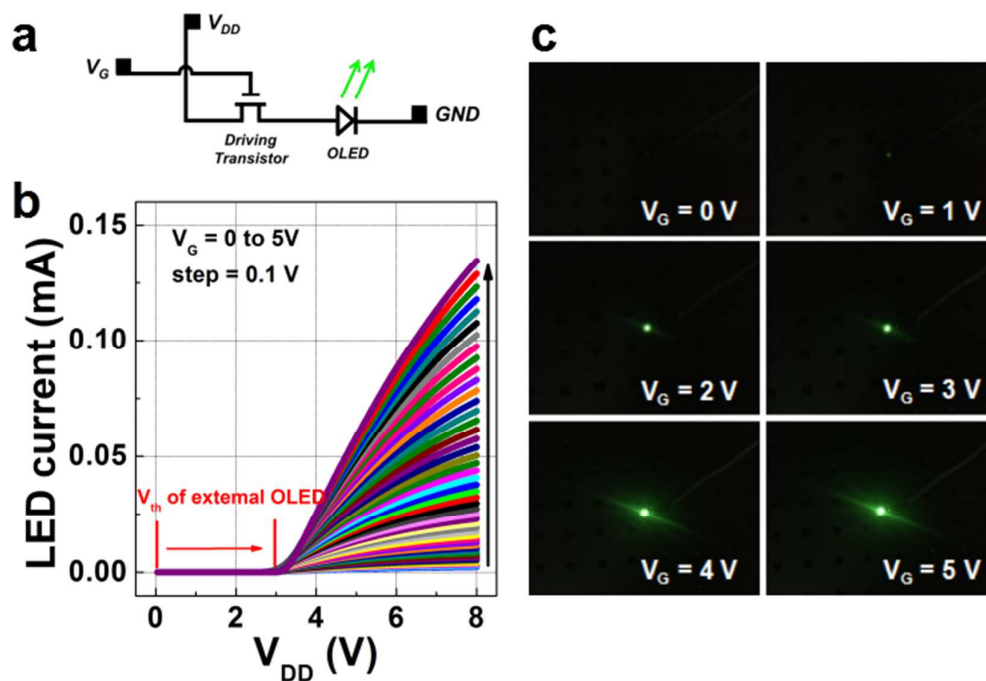

**Figure S17. (a)** Schematic diagram of one-transistor pixel circuit driven by fully FTF-processed  $\text{In}_2\text{O}_3/\text{AlO}_x$  TFTs. **(b)** Output characteristic of single pixel circuit, where the current flow through the LED ( $I_{LED}$ ) is measured by sweeping the supply voltage ( $V_{DD}$ ) while  $V_G$  ranging from 0 to 5 V with 0.1 V step. **(c)** Photographs of LED with various light intensities modulated by fully-FTF-processed  $\text{In}_2\text{O}_3/\text{AlO}_x$  TFTs ( $V_{DD} = 6$  V).

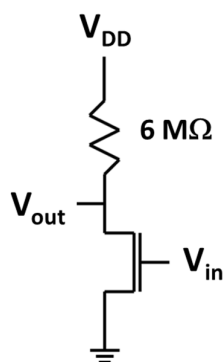

**Figure S18.** The circuit schematic of the resistor-loaded inverter based on fully-FTF-processed  $\text{In}_2\text{O}_3/\text{AlO}_x$  TFTs.

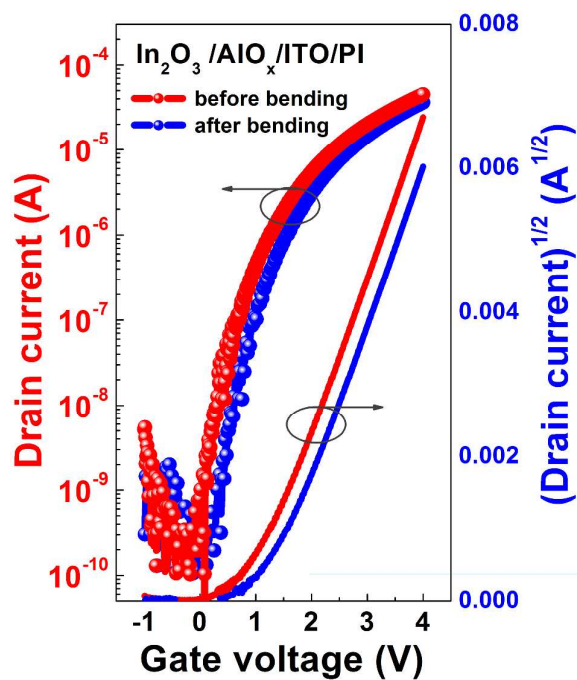

**Figure S19.** Transfer curves of the flexible  $\text{In}_2\text{O}_3/\text{AlO}_x$  TFTs before and after 100 cycles bending.
